# Supplementary material
Source: PubMed Central journal article supplement (PMC7457226)

## Supplementary Information

### **Figure S1. LPA treatment prevents starvation-induced ciliogenesis and Rabin8 trafficking, related to Figure 1.**

(A) Representative plot (mean  $\pm$  s.d.) of cell cycle analysis performed as described in Fig 1B for treatments in Fig 1A from two independent experiments.  $P < 0.001$  (\*\*\*) for G<sub>0</sub>/G<sub>1</sub> are shown. (B, C) Quantification of ciliation (B) from immunostained RPE-1 cells (C) treated with serum, starved for 24h, or starved for 24h in the presence of LPA. Cells were stained with acetylated  $\alpha$ -tubulin (<sup>A</sup>c<sup>t</sup>ub) and pericentrin antibodies. Scale bar = 10 $\mu$ m. (D) Representative plot (mean  $\pm$  s.d.) of cell counts determined following 24h treatments described in Fig 1A and Fig 2E from two independent experiments.  $P < 0.01$  (\*\*) are shown. (E-H) Quantification of primary cilia in HPNE, MCF12, MEFs, and IMCD3 cells upon treatment with LPA (5 $\mu$ M) stained with acetylated  $\alpha$ -tubulin (<sup>A</sup>c<sup>t</sup>ub) and pericentrin antibodies. (I) Live-cell epifluorescence imaging showing GFP-Rabin8 association with tRFP-Rab11a vesicles within minutes of serum starvation in stably-expressing RPE-1 cells. Scale bar = 5 $\mu$ m. (J) RPE-1 GFP-Rab11a cells were treated with serum (2%), serum starved for 1h, and serum starved with LPA (5 $\mu$ M) for 1h and then fixed with PFA and stained with the MC marker CEP164 and DAPI. Scale bar = 10 $\mu$ m.

### **Figure S2. LPA regulates ciliogenesis through the LPAR1 receptor, related to Figure 2.**

(A) Quantification of primary cilia in parental RPE-1 cells and RPE-1 LPAR1-GFP cells in serum and upon 24h starvation showing that cells overexpressing LPAR1-GFP ciliate upon serum starvation. Cells were stained with acetylated  $\alpha$ -tubulin (<sup>A</sup>c<sup>t</sup>ub) and pericentrin

antibodies. Mean  $\pm$  s.d. is shown for  $n > 100$  cells counted (B). Representative plot (mean  $\pm$  s.d.) of cell cycle analysis performed as described in Fig 1B for the treatments in Fig 2D from two independent experiments.  $P < 0.001$  (\*\*\*) for G<sub>0</sub>/G<sub>1</sub> are shown for  $n > 50$  cells per treatment. (C) A dose-course effect of Ki16425 on RPE-1 cell ciliation in the presence of 2% FBS. Cells were stained as described in (A). (D) A dose-course effect of Ki16425 on RPE-1 cell ciliation in the presence of LPA (10 $\mu$ M). Cells were stained as described in (A). (E) Representative images from (D). Scale bar 10 $\mu$ m. (F, G) Representative plot (mean  $\pm$  s.d.) of cell counts determined following 24h (F) and 1h treatments (G) with and without Ki16425 (10 $\mu$ M) as described in Fig S1D. (F) and Fig 2H (G) from two independent experiments.  $P < 0.01$  (\*\*) are shown.

**Figure S3. Akt signaling and ciliogenesis, related to Figure 3.**

(A) Quantification of Akt inhibitor MK-2206 (2.5  $\mu$ M) effects on ciliogenesis as described in Figure S1B. Representative plot from two independent experiments with  $n > 65$  cells counted. Mean  $\pm$  s.d. are shown. \*\* $P < 0.01$ . (B) Representative plot (mean  $\pm$  s.d.) of cell counts determined following 24h treatments with MK-2206 as described in (A) from two independent experiments.  $P < 0.01$  (\*\*) are shown. (C) Representative plot (mean  $\pm$  s.d.) of cell cycle analysis performed as described in Fig 1B on cells treated for 24h with MK-2206 as described in (A) two independent experiments.  $P < 0.001$  (\*\*\*) for G<sub>0</sub>/G<sub>1</sub> are shown. (D) RPE-1 cells were treated with EGF without serum for 24h and following 24h serum starvation for 5 (5') and 15 (15') minutes. Western analysis of cell lysate immunoblotted with pAKT<sup>S473</sup> and Akt antibodies. (E) Representative plot (mean  $\pm$  s.d.) of cell cycle analysis performed on cells treated with siControl and sipanAkt for 72h as

described in Fig 3G from two independent experiments.  $P < 0.001$  (\*\*\*) for G<sub>0</sub>/G<sub>1</sub> are shown.

**Figure S4. Akt phosphorylation sites at Ser147 and Ser149 of Rabin8 are not required to bind Rab11aQ70L or Rab8aT22N, related to Figure 4.**

(A) Immunoprecipitation analysis of HA-Rab11aQ70L with wild-type, phosphomimetic (S147D/S149D), and phosphoinactive (S147A/S149A) mutants of GFP-Rabin8 expressed in 293T cells. Immunoblots were probed with GFP and HA antibodies. Blots shown are from the same experiment and exposure and are representative from two independent experiments. (B) Rabin8 fragment map. (C) Co-immunoprecipitation analysis of HA-Rab11aQ70L with GFP-Rabin8 fragments expressed as described in (A). Representative blot from two independent experiments is shown. (D) Co-immunoprecipitation analysis of HA-Rab8aT22N with WT, phosphomimetic, and phosphoinactive mutants of GFP-Rabin8 as described in (A). Blots shown are from the same experiment and exposure and are representative from two independent experiments. (E) Co-immunoprecipitation analysis of HA-Rab8T22N with GFP-Rabin8 fragments as described in (A). Representative blot from two independent experiments is shown.

**Figure S5. WDR44 specifically binds Rab11 in a GTP-dependent manner, related to Figure 5.**

(A) Coomassie staining of Rab11-binding proteins immunoprecipitated from stable GFP-Rab11a RPE-1 cell lysate. Cells were grown to 70% confluency in serum (+) and were serum-starved for 1h (-). (B, C) Co-immunoprecipitation of HA-WDR44 or FLAG-Rab11b

with GFP-Rab proteins transiently-expressed in 293T cells. (D) Representative plot (mean  $\pm$  s.d.) of cell counts determined for siControl and siWDR44 72h treatments as described in Fig 5E from two independent experiments.  $P < 0.01$  (\*\*) are shown. (E) Representative plot (mean  $\pm$  s.d.) of cell cycle analysis performed as described in Fig 1B on cells treated as described in (D) from two independent experiments.  $P < 0.001$  (\*\*\*) for G<sub>0</sub>/G<sub>1</sub> are shown.

**Figure S6. WDR44 phosphomutant binding to Rab11 and effects on Zebrafish KV formation, related to Figure 6.**

(A) Immunoprecipitation showing binding of GFP-WDR44 wild-type, phosphomimetic (Aspartic acid), and phosphoinactive (Alanine) mutants (corresponding to the mapped Akt phosphorylation sites) with HA-Rab11aQ70L and immunoblotted with GFP and HA antibodies. Blots shown are from the same experiment and exposure. Representative western blots from three independent experiments is shown. (B) Analysis of Kupffer's vesicles (KV) from live embryos injected with WDR44 mutants and Rab11aS25N. Mean  $\pm$  s.e.m from  $n > 50$  KVs analyzed from three independent experiments is shown. \*\* $P < 0.001$ .

**Figure S7. WDR44 binds to Rab11 with similar affinity as FIP3-Rab11 and competes with FIP3 for Rab11, related to Figure 7.**

(A) Isothermal titration calorimetry experiment showing that the Rab11-WDR44 complex has a  $K_D$  of  $0.54 \pm 0.04 \mu\text{M}$ . (B) Immunoprecipitation experiment showing that WDR44-Rab11 interaction could be inhibited by FIP3. HA-Rab11aQ70L was co-expressed with

untagged WDR44 and FIP3. RPE-1 cells were lysed, and cell lysates were immunoprecipitated with magnetic HA beads. (C) Isothermal titration calorimetry experiment titrating Rabin8C with a preformed Rab11aQL<sub>6-186</sub>-WDR44<sub>334-435</sub> complex. Rabin8 affinity for Rab11-WDR44 is  $37.2 \pm 9.7 \mu\text{M}$ .

Figure S1

A

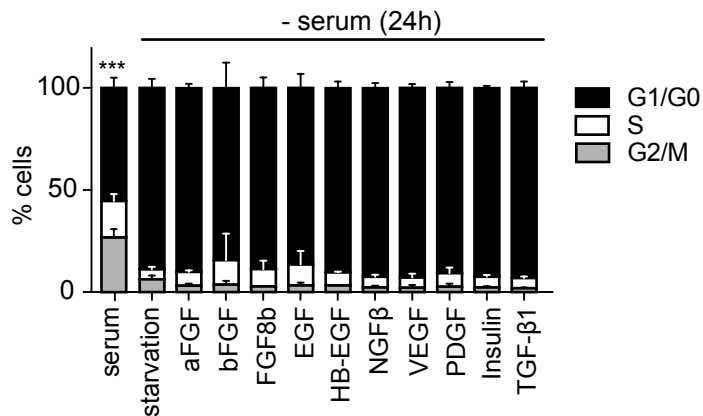

B

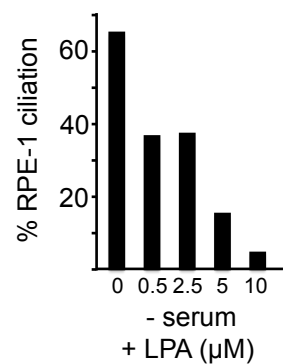

C

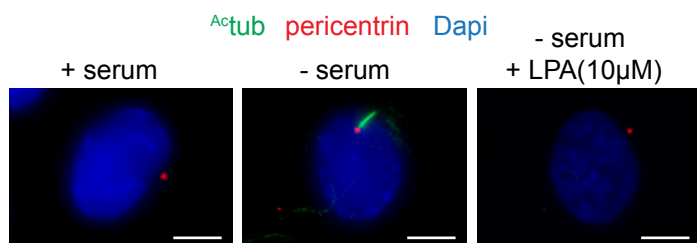

D

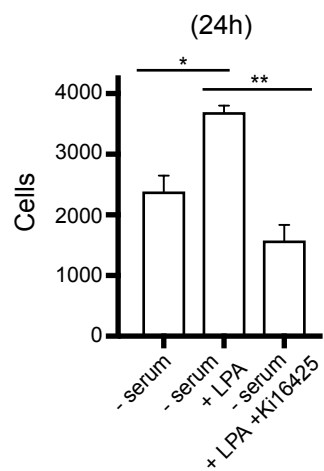

E

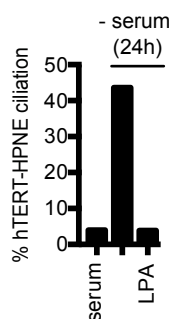

F

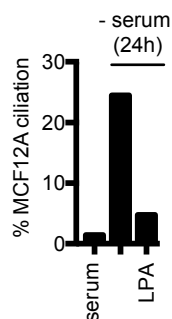

G

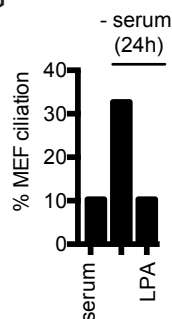

H

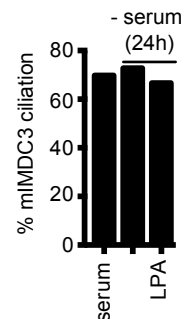

I

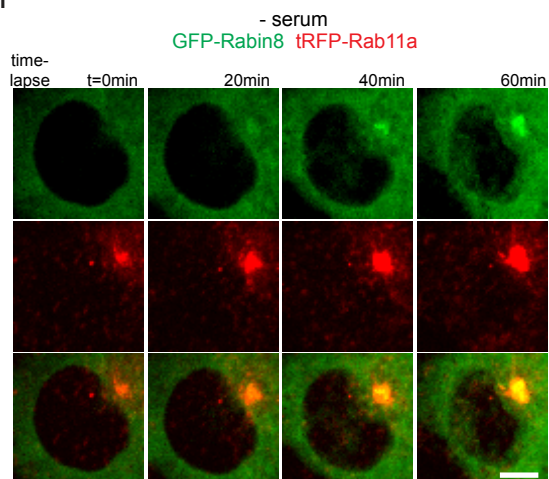

J

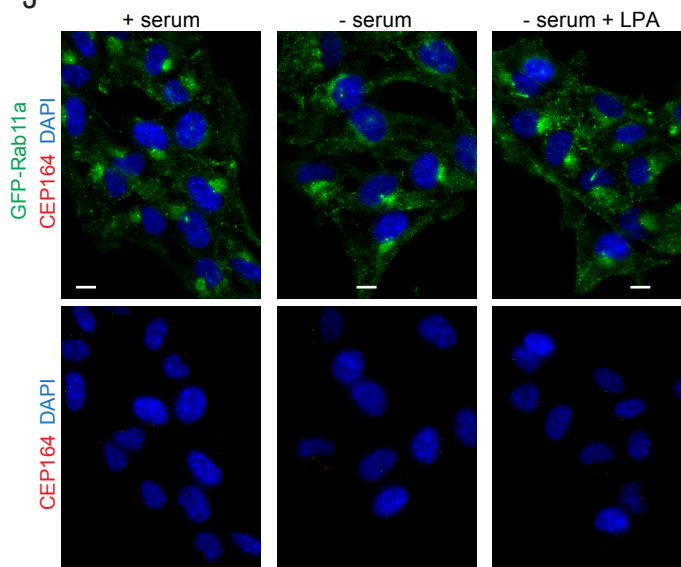

Figure S2

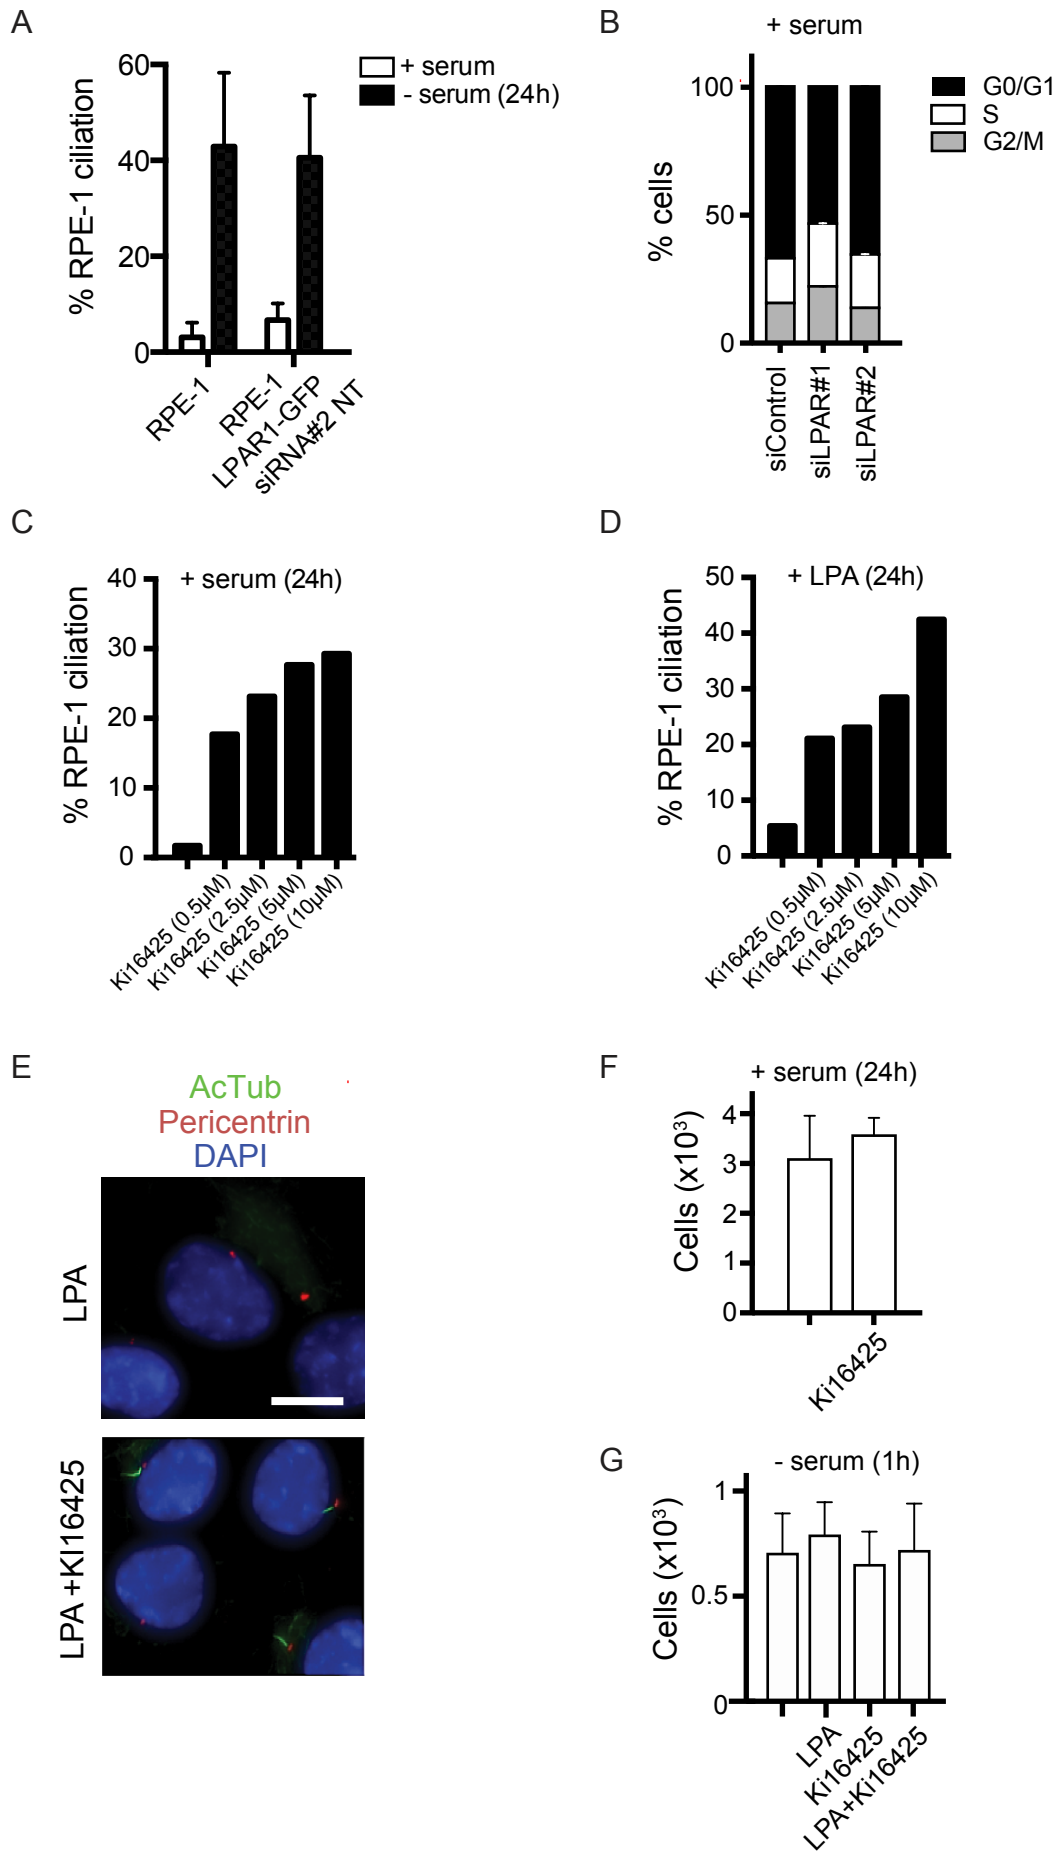

Figure S3

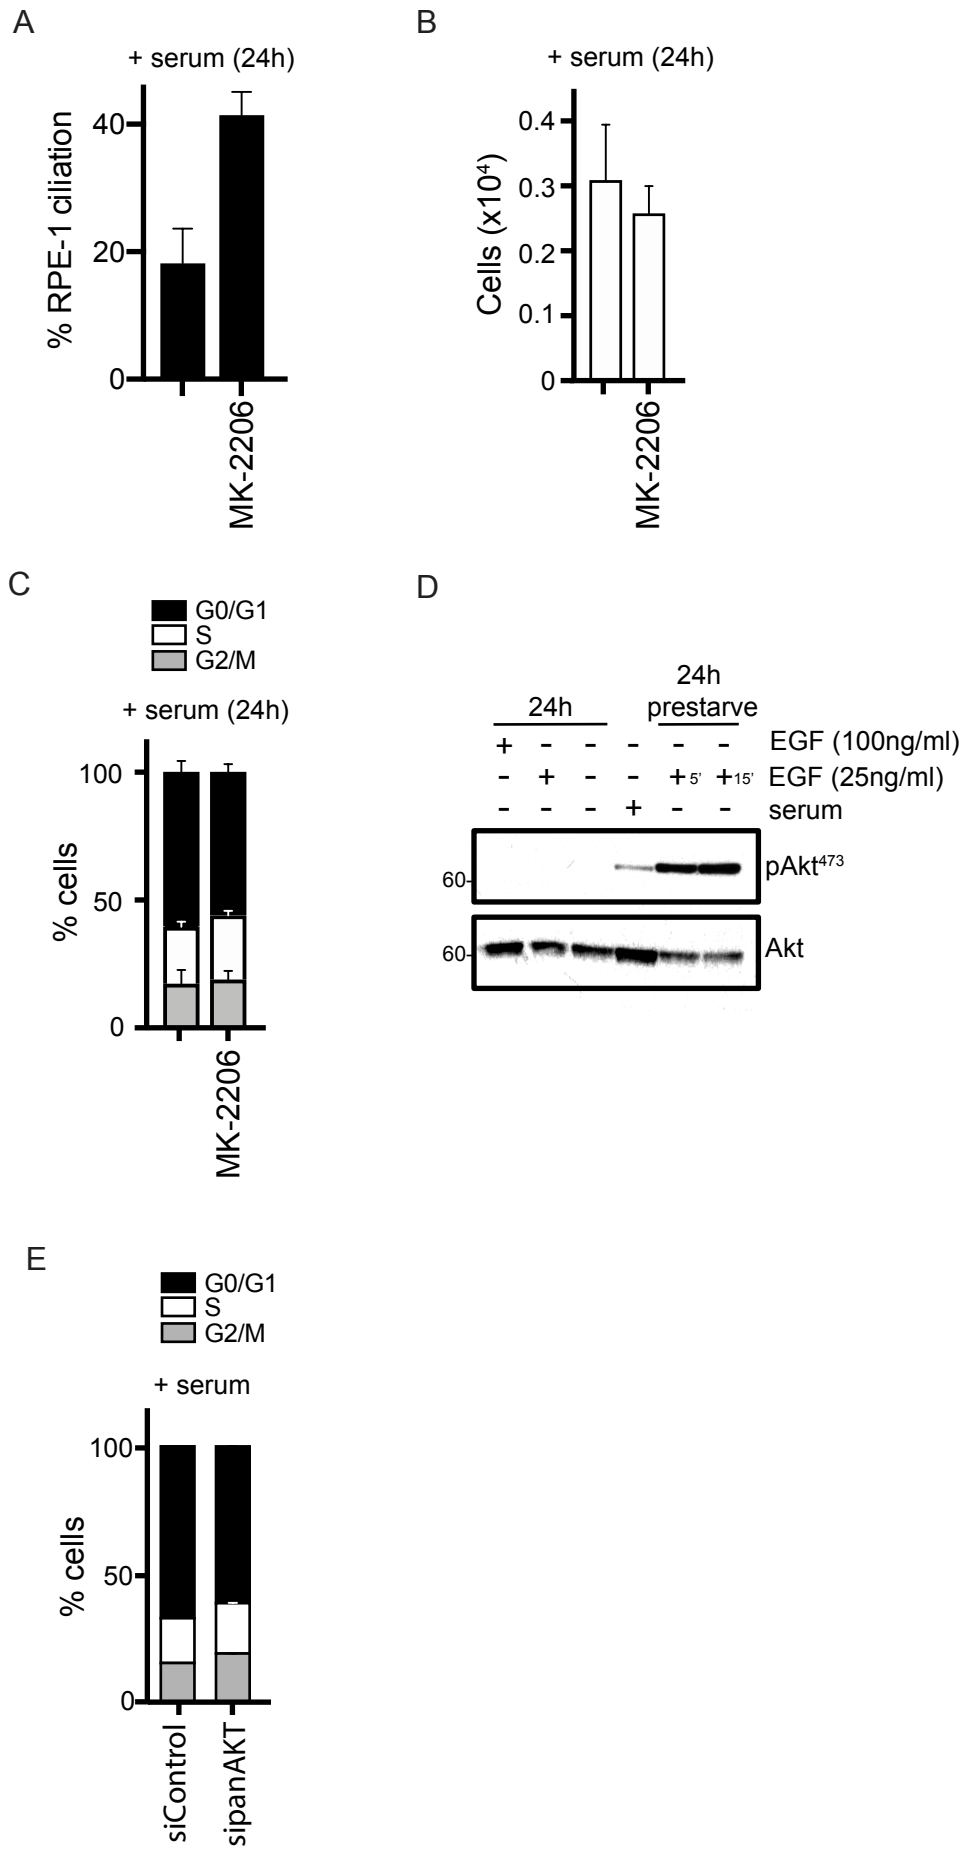



Figure S4

A

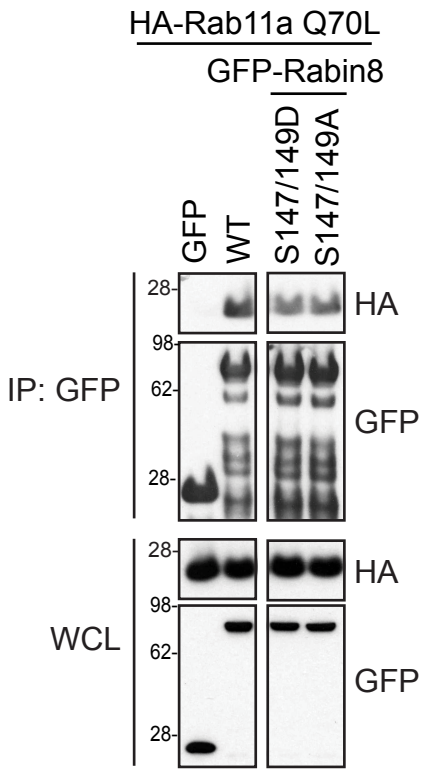

B

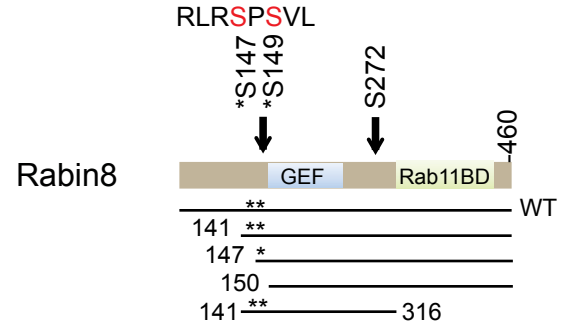

C

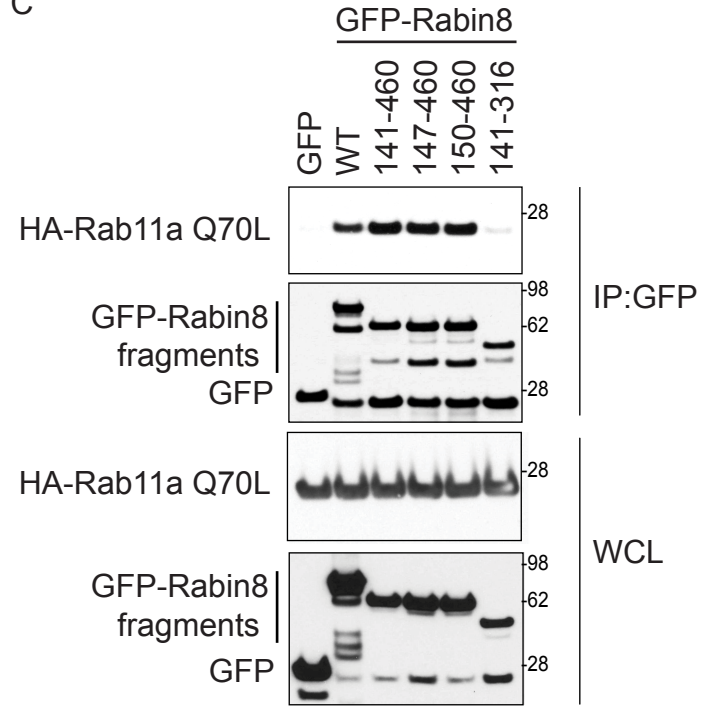

D

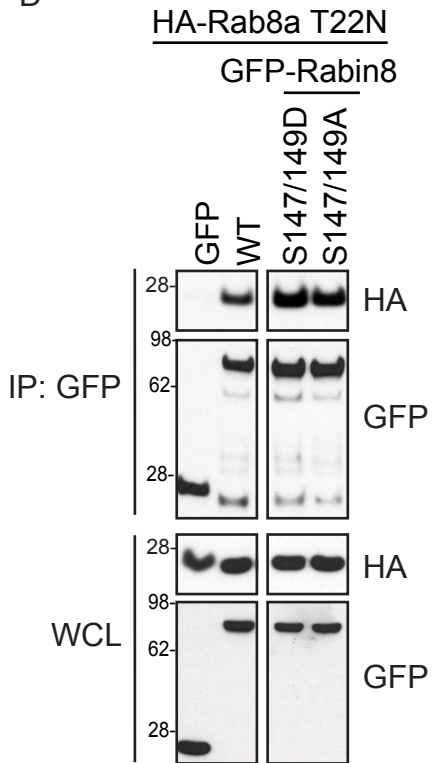

E

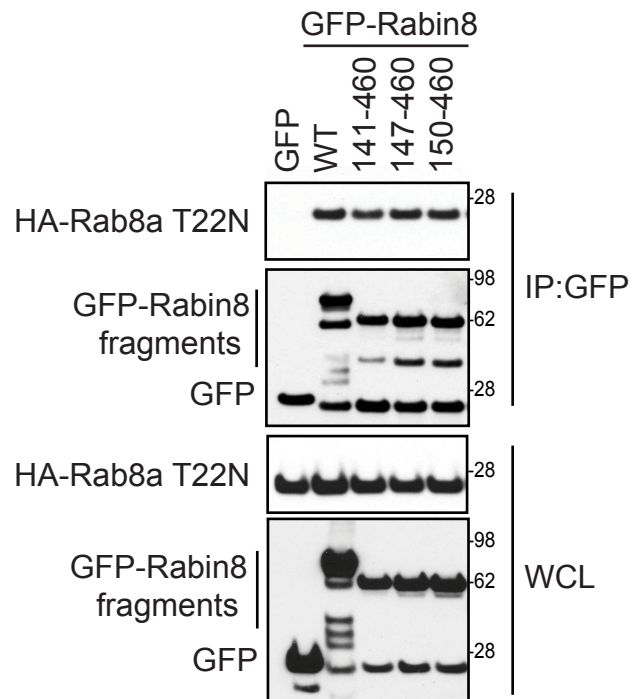

Figure S5

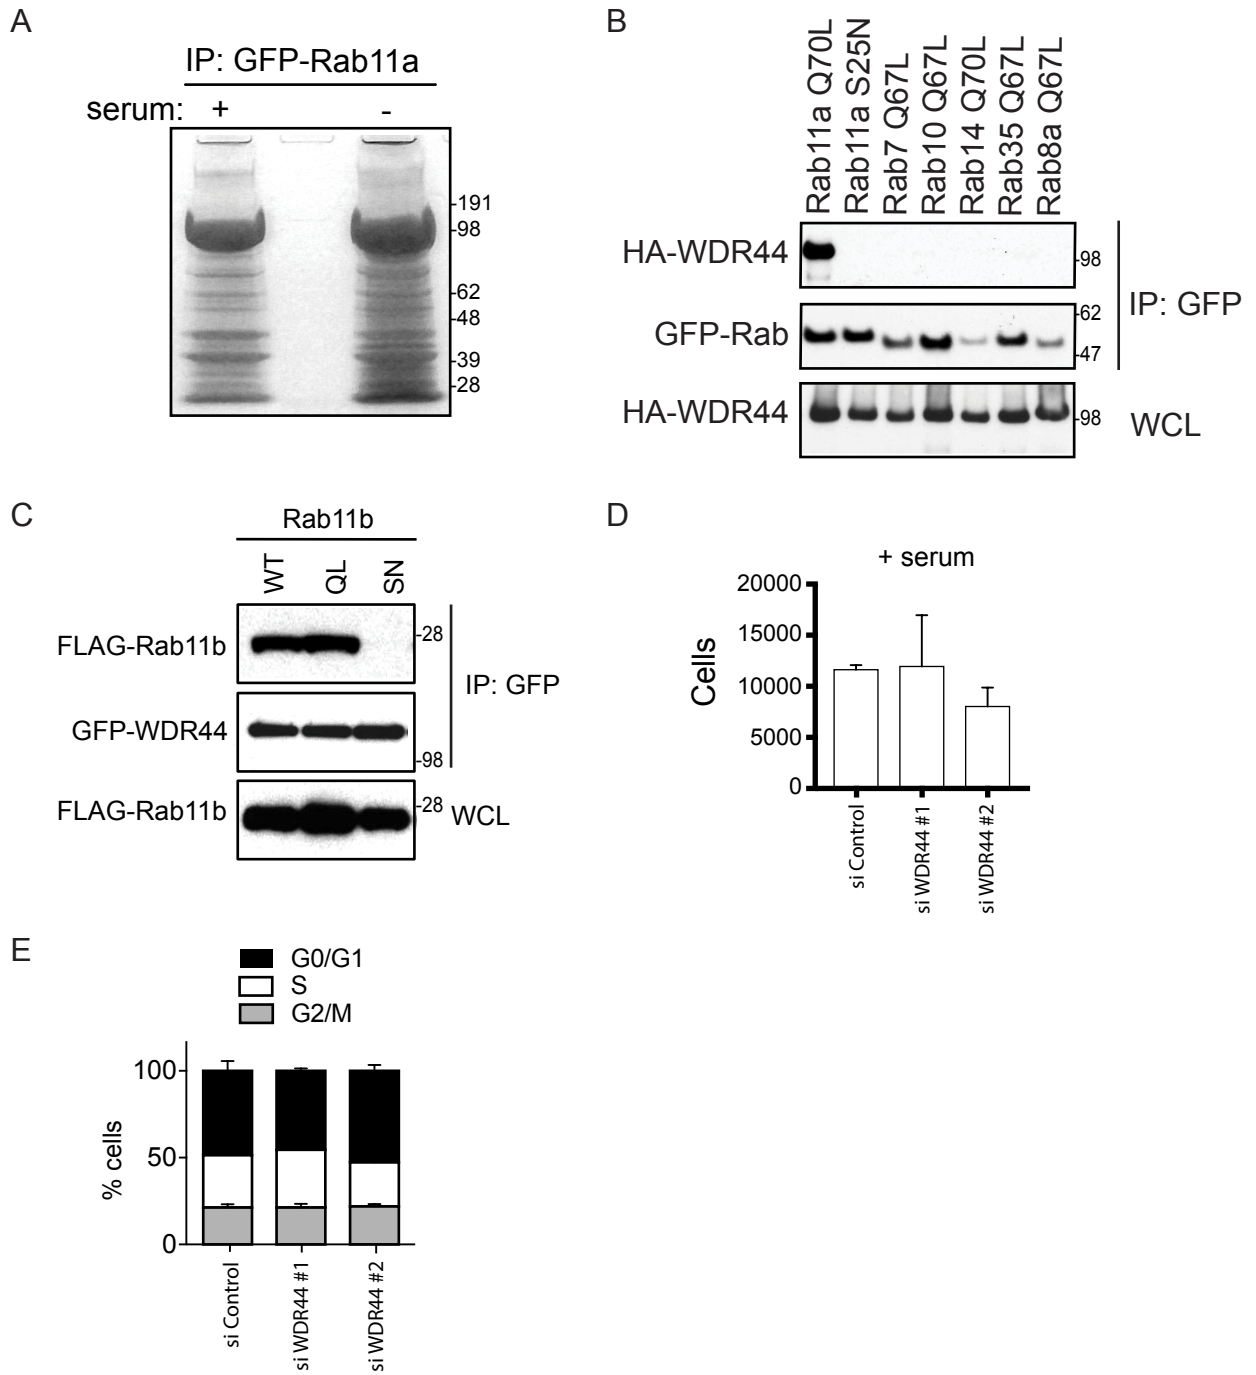

Figure S6

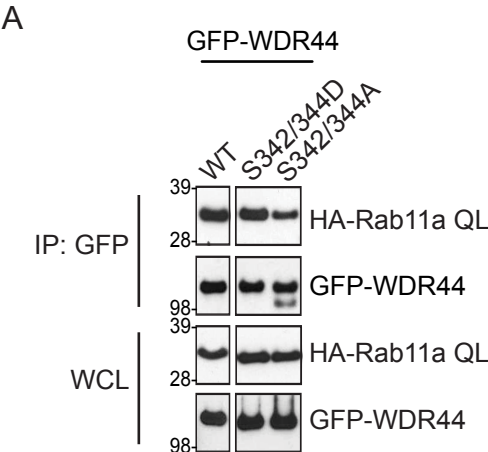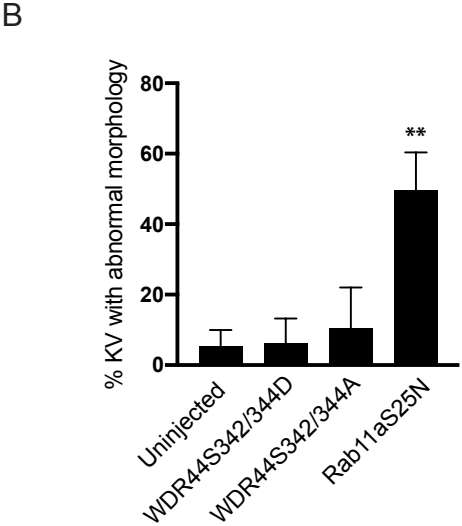

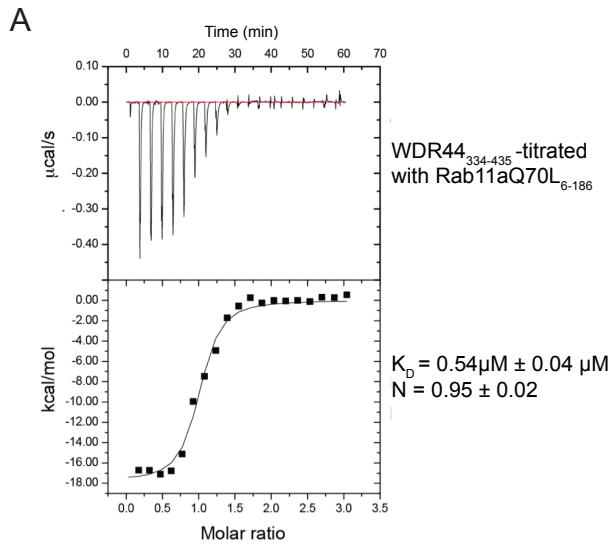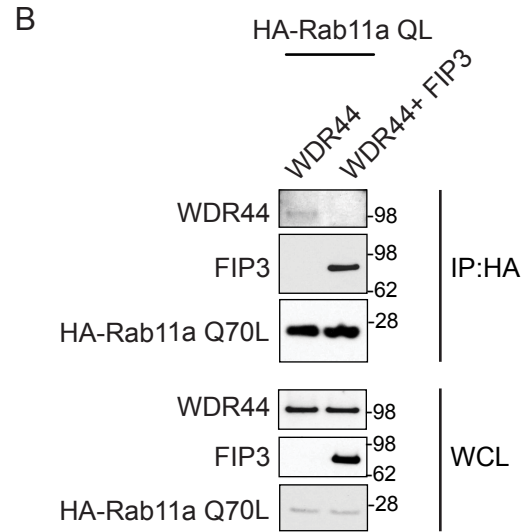

**C**

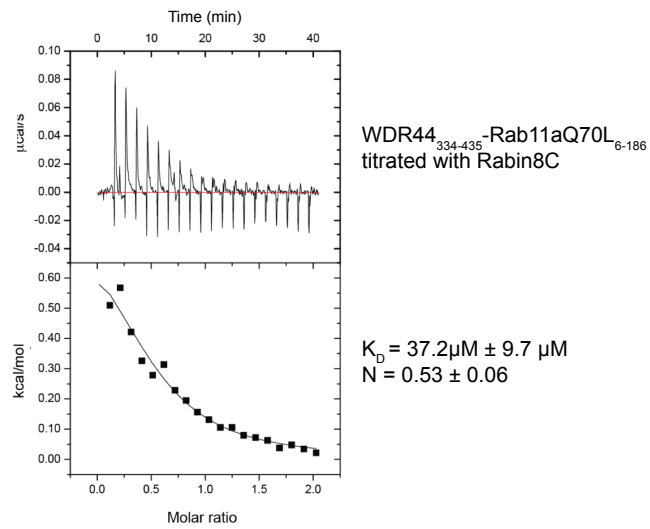

Supplement: NIHMS1618893-supplement-2.pdf [file NIHMS1618893-supplement-2.pdf]
